# Supplementary material for: Co9S8 nanotubes synthesized on the basis of nanoscale Kirkendall effect and their magnetic and electrochemical properties
Source: Royal Society of Chemistry journal article supplement (doi:10.1039/b923206k), 2010-01-01
Supplement: b923206k.pdf [file b923206k.pdf]

## •Supplementary information

### **Co<sub>9</sub>S<sub>8</sub> nanotubes synthesized on the basis of nanoscale Kirkendall effect and their magnetic and electrochemical properties**

Zhenghua Wang,\* Ling Pan, Haibo Hu and Suping Zhao

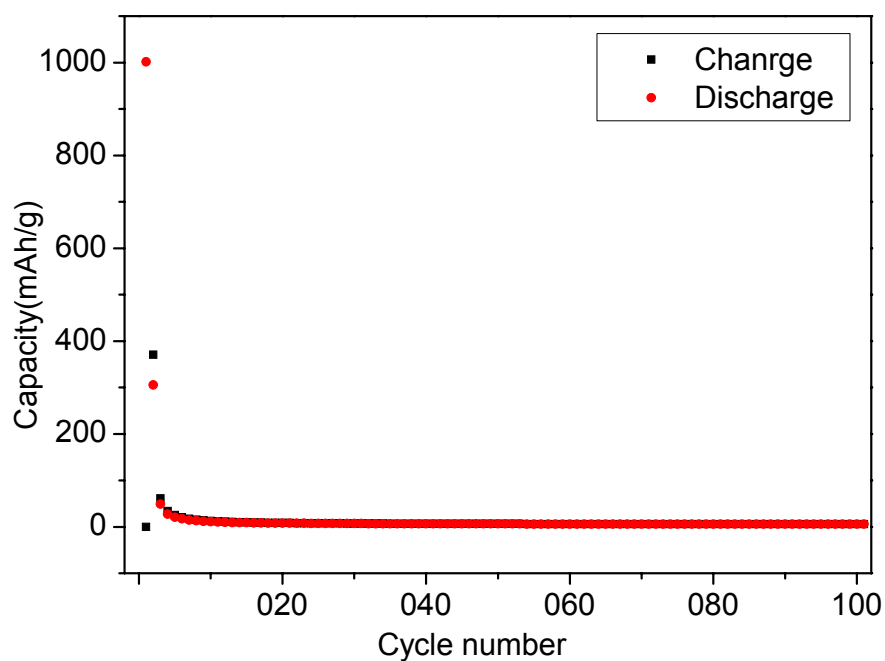

Fig. S1. Diagram of charge-discharge capacity versus cycle numbers.
